# Supplementary material
Source: PubMed Central journal article supplement (PMC4013391)
Supplement: NIHMS577736-supplement-01.pdf [file NIHMS577736-supplement-01.pdf]

## Supplementary Online Content

Vossel KA, Beagle AJ, Rabinovici GD, et al. Seizures and epileptiform activity in the early stages of Alzheimer disease. *JAMA Neurol*. Published online July 8, 2013. doi:10.1001/jamaneurol.2013.136.

**eTable.** Clinical and demographic data for each case with epilepsy or subclinical epileptiform activity.

This supplementary material has been provided by the authors to give readers additional information about their work.

**eTable: Clinical and demographic data for each case with epilepsy or subclinical epileptiform activity.**

| Case | Dx   | PMH                                                       | G | H | Age of onset of cog. decline (domain) | Age at dx of aMCI or AD | Age of 1 <sup>st</sup> seizure or EEG abnormality | MMSE (0-30) (age) | Seizure semiology and frequency                                                                        | MRI at age of dx of aMCI or AD                                                       | EEG                                                                                  | AED and dose (mg)          | Efficacy/Tolerability                                              |
|------|------|-----------------------------------------------------------|---|---|---------------------------------------|-------------------------|---------------------------------------------------|-------------------|--------------------------------------------------------------------------------------------------------|--------------------------------------------------------------------------------------|--------------------------------------------------------------------------------------|----------------------------|--------------------------------------------------------------------|
| 1    | AD   | None                                                      | M | R | 59 (memory)                           | 59                      | 61                                                | 26 (59)           | Global aphasia, once                                                                                   | L>R hippocampal and posterior temporoparietal atrophy                                | (Sleep deprived) L hemispheric slowing, frequent L anterior temporal spikes (F7, T3) | LEV 500 bid                | Seizure-free but discontinued after 1 month due to irritability    |
|      |      |                                                           |   |   |                                       |                         |                                                   |                   |                                                                                                        |                                                                                      |                                                                                      | LTG 100 bid                | Seizure-free                                                       |
| 2    | AD   | Prostate cancer, aortic valve disease HTN, PAF            | M | R | 82 (language)                         | 84                      | 84                                                | 22 (84)           | R arm shaking, as frequent as 6 times a day                                                            | R>L hippocampal and L>R posterior parietal atrophy                                   | Normal                                                                               | LEV 500 bid                | Partial response                                                   |
|      |      |                                                           |   |   |                                       |                         |                                                   |                   |                                                                                                        |                                                                                      |                                                                                      | LEV 1500 bid               | Seizure-free                                                       |
| 3    | AD   | Migraines, concussion s/p ski accident, age 24            | F | R | 41 (memory)                           | 50                      | 44                                                | 28 (44)           | Jamais vu for 1 min, sometimes followed by exhaustion, up to 3-4 times a day; déjà vu every two months | L>R hippocampal atrophy and bi-parietal atrophy                                      | L temporal slowing and L frontotemporal (F7) sharp waves                             | LTG 100 bid                | Intolerable side effect of blurred vision                          |
|      |      |                                                           |   |   |                                       |                         |                                                   |                   |                                                                                                        |                                                                                      |                                                                                      | Lorazepam as needed        | Rarely used                                                        |
| 4    | AD   | HTN, HL                                                   | M | R | 62 (memory)                           | 66                      | 51                                                | 24 (66)           | Déjà vu, up to 2-3 times a day                                                                         | Lateral parietal and frontal atrophy, hippocampal atrophy, mesial temporal sclerosis | Not performed                                                                        | CMZ                        | 7-month trial ineffective                                          |
|      |      |                                                           |   |   |                                       |                         |                                                   |                   |                                                                                                        |                                                                                      |                                                                                      | LTG 225-300 bid            | Partial response                                                   |
| 5    | AD   | HL                                                        | F | R | 65 (memory)                           | 68                      | 69                                                | 11 (69)           | Warm sensation in chest, disorientation, staring lasting 2-3 min, occurring up to 3 times a day        | Not performed                                                                        | (Sleep deprived) Diffuse R hemispheric slowing with R temporal sharps and spikes     | LTG 100 bid                | Seizure-free                                                       |
| 6    | AD   | HL, concussion s/p fall at age 63 (negative head imaging) | F | R | 67 (memory)                           | 67                      | 67                                                | 23 (67)           | Speech arrest, epilepsia partialis continua                                                            | Generalized cortical atrophy                                                         | (LTM) Multiple seizures centered around frontal vertex (Fz)                          | VPA 500 ER bid             | Neutral effects                                                    |
|      |      |                                                           |   |   |                                       |                         |                                                   |                   |                                                                                                        |                                                                                      |                                                                                      | LEV 1500 bid               | Partial response                                                   |
|      |      |                                                           |   |   |                                       |                         |                                                   |                   |                                                                                                        |                                                                                      |                                                                                      | LEV 1500 bid<br>TPM 25 bid | Seizure-free                                                       |
| 7    | aMCI | HTN, HL, vitamin D deficiency                             | M | R | 71 (memory)                           | 73                      | 71                                                | 29 (73)           | Unresponsive, humming/growling lasting seconds to minutes occurring weekly                             | Global atrophy, scattered foci of periventricular white matter T2 hyperintensities   | L frontotemporal spikes and sharp waves                                              | LTG 100 bid                | Seizure-free; repeat EEG on LTG negative for epileptiform activity |

Abbreviations: AD=Alzheimer's disease, AED=antileptic drug, aMCI=amnesic mild cognitive impairment, bid=twice a day, CABG=coronary artery bypass graft, CAD=coronary artery disease, CMZ=carbamazepine, cog.=cognitive, CPAP= continuous positive airway pressure, dx=diagnosis, G=gender, H=handedness, HTN=hypertension, HL=hyperlipidemia, L=left, LEV=levetiracetam, LTG=lamotrigine, LTM=long-term video-EEG monitoring, MMSE=Mini-Mental State Exam, OSA=obstructive sleep apnea, PAF=paroxysmal atrial fibrillation, PHT=phenytoin, PMH=past medical history, s/p=status post, qam=every morning, qd=every day, qhs=every bedtime, qpm=every evening, R=right, SD=standard deviation, tid=three times a day, TPM=topiramate, VPA=valproic acid.

eTable (continued):

| Case | Dx   | PMH                                                                                              | G | H | Age of onset of cog. decline (domain) | Age at dx of aMCI or AD | Age of 1 <sup>st</sup> seizure or EEG abnormality | MMSE (0-30) (age) | Seizure semiology and frequency                                                                                          | MRI at age of dx of aMCI or AD                                      | EEG                                                                                                                                                                        | AED and dose (mg)                                  | Efficacy/Tolerability                                                       |
|------|------|--------------------------------------------------------------------------------------------------|---|---|---------------------------------------|-------------------------|---------------------------------------------------|-------------------|--------------------------------------------------------------------------------------------------------------------------|---------------------------------------------------------------------|----------------------------------------------------------------------------------------------------------------------------------------------------------------------------|----------------------------------------------------|-----------------------------------------------------------------------------|
| 8    | aMCI | Strep. viridans endocarditis s/p CABG, aortic valve replacement; pacemaker for ictal bradycardia | M | R | 65 (memory)                           | 68                      | 67                                                | 29 (68)           | Blank stare, then unresponsiveness for 5 min with or without convulsions, occurring up to twice a day                    | Global atrophy, mild subcortical white matter disease               | 1 <sup>st</sup> : Normal<br>2 <sup>nd</sup> : Epileptiform discharges over R frontal region<br>3 <sup>rd</sup> (LTM): frequent R anterior temporal epileptiform discharges | LEV XR 3000 qd                                     | Partial response; returned to work and felt "sharper"                       |
|      |      |                                                                                                  |   |   |                                       |                         |                                                   |                   |                                                                                                                          |                                                                     |                                                                                                                                                                            | LEV XR 3000 qd<br>Pregabalin 75 bid                | Seizure-free                                                                |
| 9    | aMCI | Type II diabetes, hypothyroidism                                                                 | F | R | 58 (memory)                           | 60                      | 58                                                | None              | Aura of fear and epigastric rising sensation followed by loss of consciousness for 5 min, occurring up to 5 times a week | Mild senescent changes                                              | L temporal seizures and interictal L anterior temporal sharp waves (F7,T3), intermittent L temporal slowing                                                                | LEV 1500 bid                                       | Neutral effects                                                             |
|      |      |                                                                                                  |   |   |                                       |                         |                                                   |                   |                                                                                                                          |                                                                     |                                                                                                                                                                            | LEV 1500 bid<br>LTG 200 bid,<br>Pregabalin 225 bid | Partial response; side effect of fatigue                                    |
|      |      |                                                                                                  |   |   |                                       |                         |                                                   |                   |                                                                                                                          |                                                                     |                                                                                                                                                                            | LTG 250 bid<br>Oxcarbazepine 450 bid               | Seizure-free                                                                |
| 10   | AD   | None                                                                                             | M | R | 70 (memory)                           | 71                      | 70                                                | 16 (75)           | Staring spells lasting 30 sec occurring weekly; "slumps" lasting minutes occurring every few months                      | L hippocampal atrophy and mild periventricular white matter changes | L temporal slowing                                                                                                                                                         | LEV 1250 bid                                       | Partial response; side effect of irritability                               |
|      |      |                                                                                                  |   |   |                                       |                         |                                                   |                   |                                                                                                                          |                                                                     |                                                                                                                                                                            | LEV 750 bid                                        | Partial response; well tolerated                                            |
| 11   | AD   | None                                                                                             | F | R | 49 (language)                         | 53                      | 53                                                | 23 (53)           | Subclinical epileptiform activity                                                                                        | L>R parietal volume loss                                            | 1 <sup>st</sup> : intermittent left frontotemporal slowing<br>2 <sup>nd</sup> : (LTM) L frontal epileptiform discharges (Cz, C3, F3) every few minutes                     | LTG                                                | Intolerable side effect of fatigue and sensation of muscle twitches in arms |
|      |      |                                                                                                  |   |   |                                       |                         |                                                   |                   |                                                                                                                          |                                                                     |                                                                                                                                                                            | LEV 1000 bid                                       | Remained seizure-free; repeat EEG on LEV showed no epileptiform activity    |

Abbreviations: AD=Alzheimer's disease, AED=antiepileptic drug, aMCI=amnesic mild cognitive impairment, bid=twice a day, CABG=coronary artery bypass graft, CAD=coronary artery disease, CMZ=carbamazepine, cog.=cognitive, CPAP= continuous positive airway pressure, dx=diagnosis, G=gender, H=handedness, HTN=hypertension, HL=hyperlipidemia, L=left, LEV=levetiracetam, LTG=lamotrigine, LTM=long-term video-EEG monitoring, MMSE=Mini-Mental State Exam, OSA=obstructive sleep apnea, PAF=paroxysmal atrial fibrillation, PHT=phenytoin, PMH=past medical history, s/p=status post, qam=every morning, qd=every day, qhs=every bedtime, qpm=every evening, R=right, SD=standard deviation, tid=three times a day, TPM=topiramate, VPA=valproic acid.

eTable (continued):

| Case | Dx   | PMH                                                                                 | G | H | Age of onset of cog. decline (domain) | Age at dx of aMCI or AD | Age of 1 <sup>st</sup> seizure or EEG abnormality | MMSE (0-30) (age) | Seizure semiology and frequency                                                                         | MRI at age of dx of aMCI or AD                                   | EEG                                                                                                                                                   | AED and dose (mg) | Efficacy/Tolerability                                                                             |
|------|------|-------------------------------------------------------------------------------------|---|---|---------------------------------------|-------------------------|---------------------------------------------------|-------------------|---------------------------------------------------------------------------------------------------------|------------------------------------------------------------------|-------------------------------------------------------------------------------------------------------------------------------------------------------|-------------------|---------------------------------------------------------------------------------------------------|
| 12   | aMCI | CAD s/p angioplasty, HTN                                                            | M | R | 57 (memory)                           | 67                      | 57                                                | 29 (67)           | Generalized tonic-clonic, occurring monthly to yearly                                                   | Atrophy of medial temporal lobes and amygdala                    | 2 routine and 1 multi-day EEG negative for epileptiform activity                                                                                      | PHT               | Partial response; worsened cognitive function                                                     |
|      |      |                                                                                     |   |   |                                       |                         |                                                   |                   |                                                                                                         |                                                                  |                                                                                                                                                       | LTG               | Discontinued because of rash                                                                      |
|      |      |                                                                                     |   |   |                                       |                         |                                                   |                   |                                                                                                         |                                                                  |                                                                                                                                                       | Oxcarbazepine     | Partial response                                                                                  |
|      |      |                                                                                     |   |   |                                       |                         |                                                   |                   |                                                                                                         |                                                                  |                                                                                                                                                       | VPA               | Partial response; Side effects of weight gain (>50 lbs), HTN, and worsening of cognitive function |
|      |      |                                                                                     |   |   |                                       |                         |                                                   |                   |                                                                                                         |                                                                  |                                                                                                                                                       |                   |                                                                                                   |
| 13   | AD   | HL                                                                                  | F | R | 84 (memory)                           | 86                      | 86                                                | None              | L arm rigidity, postictal confusion, occurring weekly                                                   | General atrophy and diffuse periventricular white matter disease | Not performed                                                                                                                                         | LTG 50 bid        | Seizure-free with improved cognitive and functional status                                        |
| 14   | aMCI | Remote history of malaria, concussion s/p car accident at age 48 (head CT negative) | F | R | 50 (memory)                           | 55                      | 41                                                | 30 (55)           | Smelling foul odor followed by amnesic spells, occurring monthly to yearly; once involved R arm shaking | Posterior cortical atrophy                                       | 1 <sup>st</sup> : L posterior temporal sharp waves, L > R temporal slowing in temporal region<br>2 <sup>nd</sup> : left anterior temporal sharp waves | Carbamazepine     | Neutral effects                                                                                   |
|      |      |                                                                                     |   |   |                                       |                         |                                                   |                   |                                                                                                         |                                                                  |                                                                                                                                                       | Gabapentin        | Neutral effects                                                                                   |
|      |      |                                                                                     |   |   |                                       |                         |                                                   |                   |                                                                                                         |                                                                  |                                                                                                                                                       | TPM               | Neutral effects                                                                                   |
|      |      |                                                                                     |   |   |                                       |                         |                                                   |                   |                                                                                                         |                                                                  |                                                                                                                                                       | Zonisamide        | Partial response                                                                                  |
|      |      |                                                                                     |   |   |                                       |                         |                                                   |                   |                                                                                                         |                                                                  |                                                                                                                                                       |                   |                                                                                                   |
| 15   | aMCI | HTN, hypothyroidism, renal cancer s/p L nephrectomy                                 | F | L | 54 (memory)                           | 55                      | 54                                                | 27 (55)           | Amnesic spells with confusion followed by exhaustion, occurring weekly to monthly                       | Cortical atrophy, few scattered white matter T2 hyperintensities | (Sleep deprived) mild diffuse slowing                                                                                                                 | LEV 500 bid       | Partial response, less amnesic spells, stable cognition                                           |

Abbreviations: AD=Alzheimer’s disease, AED=antiepileptic drug, aMCI=amnesic mild cognitive impairment, bid=twice a day, CABG=coronary artery bypass graft, CAD=coronary artery disease, CMZ=carbamazepine, cog.=cognitive, CPAP= continuous positive airway pressure, dx=diagnosis, G=gender, H=handedness, HTN=hypertension, HL=hyperlipidemia, L=left, LEV=levetiracetam, LTG=lamotrigine, LTM=long-term video-EEG monitoring, MMSE=Mini-Mental State Exam, OSA=obstructive sleep apnea, PAF=paroxysmal atrial fibrillation, PHT=phenytoin, PMH=past medical history, s/p=status post, qam=every morning, qd=every day, qhs=every bedtime, qpm=every evening, R=right, SD=standard deviation, tid=three times a day, TPM=topiramate, VPA=valproic acid.

**eTable (continued):**

| Case | Dx | PMH                                                                                                                | G | H | Age of onset of cog. decline (domain) | Age at dx of aMCI or AD | Age of 1 <sup>st</sup> seizure or EEG abnormality | MMSE (0-30) (age) | Seizure semiology and frequency                                                                                                        | MRI at age of dx of aMCI or AD                                      | EEG                                                                                                                                                      | AED and dose (mg)       | Efficacy/Tolerability                                                       |
|------|----|--------------------------------------------------------------------------------------------------------------------|---|---|---------------------------------------|-------------------------|---------------------------------------------------|-------------------|----------------------------------------------------------------------------------------------------------------------------------------|---------------------------------------------------------------------|----------------------------------------------------------------------------------------------------------------------------------------------------------|-------------------------|-----------------------------------------------------------------------------|
| 16   | AD | HTN, HL, psoriasis, OSA, concussion at age 10 s/p fall off swing, "bell rung" as high school football player       | M | R | 61 (memory)                           | 66                      | 61                                                | 27 (64)           | Metallic taste followed by abdominal discomfort and nausea lasting 5 min, followed by fatigue and confusion, occurring daily to weekly | Mild subcortical ischemia                                           | No abnormal activity                                                                                                                                     | LTG 100 qam and 200 qhs | Partial response                                                            |
| 17   | AD | non-Hodgkin's lymphoma in remission, HTN, hypothyroidism, myoclonus, concussion s/p fall off sofa at age 1.5 years | F | R | 66 (language)                         | 70                      | 74                                                | 9 (71)            | Focal motor seizure with altered consciousness evolving into generalized convulsions, occurring once                                   | L sided hippocampal atrophy                                         | 1 <sup>st</sup> : L hemispheric slowing<br>2 <sup>nd</sup> : R epileptiform discharges (C4, P4) maximal over R midtemporal region and background slowing | LTG 50 bid              | Seizure-free, neutral effects on myoclonus                                  |
| 18   | AD | Diet-controlled diabetes type 2, HL, facial myoclonus and aphasia exacerbated by bupropion                         | F | R | 55 (language)                         | 59                      | 59                                                | 24 (59)           | Generalized tonic-clonic seizure once; jerking during sleep                                                                            | Posterior parietal atrophy                                          | (LTM done prior to 1 <sup>st</sup> seizure)<br>Epileptiform discharges over L posterior temporal region (T3, T5)                                         | PHT 15 mg/kg oral load  | Worse facial myoclonus                                                      |
|      |    |                                                                                                                    |   |   |                                       |                         |                                                   |                   |                                                                                                                                        |                                                                     |                                                                                                                                                          | Levetiracetam 250 bid   | Seizure-free; facial myoclonus abated; nighttime jerking lessened           |
| 19   | AD | Ulcerative colitis, HL, tongue cancer removed, concussion s/p car accident at age 70                               | F | R | 69 (memory)                           | 77                      | 74                                                | 29 (75)           | Disorientation and hallucinations evolving into convulsive seizure, occurring once                                                     | Diffuse cortical atrophy, mild periventricular white matter disease | L anterior and mid-temporal sharp-wave discharges (~1 sec each) occurring up to twice a min; unable to repeat phrases during epileptic discharges        | LEV 125 bid             | Seizure-free; 36-hour LTM while weaning LEV showed no epileptiform activity |

Abbreviations: AD=Alzheimer's disease, AED=antiepileptic drug, aMCI=amnesic mild cognitive impairment, bid=twice a day, CABG=coronary artery bypass graft, CAD=coronary artery disease, CMZ=carbamazepine, cog.=cognitive, CPAP= continuous positive airway pressure, dx=diagnosis, G=gender, H=handedness, HTN=hypertension, HL=hyperlipidemia, L=left, LEV=levetiracetam, LTG=lamotrigine, LTM=long-term video-EEG monitoring, MMSE=Mini-Mental State Exam, OSA=obstructive sleep apnea, PAF=paroxysmal atrial fibrillation, PHT=phenytoin, PMH=past medical history, s/p=status post, qam=every morning, qd=every day, qhs=every bedtime, qpm=every evening, R=right, SD=standard deviation, tid=three times a day, TPM=topiramate, VPA=valproic acid.

**eTable (continued):**

| Case | Dx   | PMH                                                                                                                       | G | H | Age of onset of cog. decline (domain) | Age at dx of aMCI or AD | Age of 1 <sup>st</sup> seizure or EEG abnormality | MMSE (0-30) (age) | Seizure semiology and frequency                                                                                                                                              | MRI at age of dx of aMCI or AD                                                                                  | EEG                                                                                                                                                                  | AED and dose (mg) | Efficacy/Tolerability                                                                                                                                                                                    |
|------|------|---------------------------------------------------------------------------------------------------------------------------|---|---|---------------------------------------|-------------------------|---------------------------------------------------|-------------------|------------------------------------------------------------------------------------------------------------------------------------------------------------------------------|-----------------------------------------------------------------------------------------------------------------|----------------------------------------------------------------------------------------------------------------------------------------------------------------------|-------------------|----------------------------------------------------------------------------------------------------------------------------------------------------------------------------------------------------------|
| 20   | AD   | Prostate cancer s/p prostatectomy, concussion s/p bus accident age 10, myoclonus exacerbated by exposure to bright lights | M | R | 63 (language)                         | 63                      | 69                                                | 7 (68)            | Collapse/tonic spells x 2 min occurring monthly to yearly                                                                                                                    | Moderate cortical atrophy                                                                                       | L frontal spike and generalized photoparoxysmal response of 2 Hz polyspike and wave time-locked with flashing lights occurring maximally in a bifrontal distribution | PHT 200 bid       | Neutral effects on myoclonus and seizures; developed more cognitive fluctuations, agitation, inanition, apathy, clumsiness, imbalance with falls, incoherent speech; also developed gingival hyperplasia |
|      |      |                                                                                                                           |   |   |                                       |                         |                                                   |                   |                                                                                                                                                                              |                                                                                                                 |                                                                                                                                                                      | LEV 750 bid       | Seizure-free with reduced myoclonus; improved cognitive and motor function                                                                                                                               |
| 21   | AD   | None                                                                                                                      | F | R | 66 (memory)                           | 67                      | 67                                                | 18 (67)           | Subclinical epileptiform activity                                                                                                                                            | Moderate cortical atrophy R>L                                                                                   | R>L frontotemporal sharp discharges                                                                                                                                  | LEV 1500 qd       | Anxiety, confusion, diarrhea                                                                                                                                                                             |
| 22   | aMCI | Pacemaker for asystole following seizure                                                                                  | F | R | 68 (memory)                           | 70                      | 68                                                | 28 (70)           | Metallic taste and smell, electrical sensation in head, nausea, fatigue, and loss of awareness, sometimes evolving into generalized convulsions, occurring weekly to monthly | Normal                                                                                                          | Generalized slowing                                                                                                                                                  | LTG 100-250 bid   | Partial response (breakthrough complex partial seizures without secondary generalization); LTG 250 bid caused imbalance and tremor; LTG dosage optimized at 225 mg bid; improved short-term memory       |
| 23   | aMCI | Rheumatoid arthritis, anemia of chronic disease                                                                           | M | R | 64 (memory)                           | 66                      | 64                                                | 28 (66)           | Déjà vu occurring daily then lessened in frequency                                                                                                                           | Diffuse cerebral atrophy most significantly in temporoparietal distribution, with bilateral hippocampal atrophy | Not performed                                                                                                                                                        | None              | Not applicable                                                                                                                                                                                           |

Abbreviations: AD=Alzheimer’s disease, AED=antiepileptic drug, aMCI=amnesic mild cognitive impairment, bid=twice a day, CABG=coronary artery bypass graft, CAD=coronary artery disease, CMZ=carbamazepine, cog.=cognitive, CPAP= continuous positive airway pressure, dx=diagnosis, G=gender, H=handedness, HTN=hypertension, HL=hyperlipidemia, L=left, LEV=levetiracetam, LTG=lamotrigine, LTM=long-term video-EEG monitoring, MMSE=Mini-Mental State Exam, OSA=obstructive sleep apnea, PAF=paroxysmal atrial fibrillation, PHT=phenytoin, PMH=past medical history, s/p=status post, qam=every morning, qd=every day, qhs=every bedtime, qpm=every evening, R=right, SD=standard deviation, tid=three times a day, TPM=topiramate, VPA=valproic acid.

eTable (continued):

| Case | Dx   | PMH                                                                                                    | G | H | Age of onset of cog. decline (domain) | Age at dx of aMCI or AD | Age of 1 <sup>st</sup> seizure or EEG abnormality | MMSE (0-30) (age) | Seizure semiology and frequency                                                                                                               | MRI at age of dx of aMCI or AD                                        | EEG                                                                                                     | AED and dose (mg)    | Efficacy/Tolerability                                                                            |
|------|------|--------------------------------------------------------------------------------------------------------|---|---|---------------------------------------|-------------------------|---------------------------------------------------|-------------------|-----------------------------------------------------------------------------------------------------------------------------------------------|-----------------------------------------------------------------------|---------------------------------------------------------------------------------------------------------|----------------------|--------------------------------------------------------------------------------------------------|
| 24   | AD   | HL, hypo-thyroidism                                                                                    | F | R | 55 (memory)                           | 60                      | 64                                                | 6 (63)            | Generalized tonic-clonic, occurring monthly                                                                                                   | Parietal atrophy (L>R) and mild frontal atrophy                       | Not performed                                                                                           | LEV 125- 250 bid     | Seizure-free; LEV 250 bid caused irritability, which improved slightly with reduction to 125 bid |
| 25   | AD   | Remote uterine cancer, s/p abdominal hysterectomy-bilateral salpingo-oophorectomy                      | F | R | 64 (memory)                           | 66                      | 66                                                | 19 (66)           | Disorientation and speech arrest often progressing to generalized tonic-clonic seizures with week-long postictal confusion, occurring monthly | R>L hippocampal atrophy and scattered subcortical T2 hyperintensities | Normal                                                                                                  | PHT 400 qd           | Breakthrough generalized tonic-clonic seizures                                                   |
|      |      |                                                                                                        |   |   |                                       |                         |                                                   |                   |                                                                                                                                               |                                                                       |                                                                                                         | LEV 500 bid          | Partial response; used for only a few days before switching to LTG                               |
|      |      |                                                                                                        |   |   |                                       |                         |                                                   |                   |                                                                                                                                               |                                                                       |                                                                                                         | LTG 100 bid          | Partial response. No generalized tonic-clonic seizures                                           |
| 26   | AD   | Sjögren's syndrome, remote history of meningitis and transverse myelitis, thyroid cancer s/p resection | F | R | 56 (executive)                        | 59                      | 56                                                | 25 (59)           | L hand shaking and clawing and brief lapses of consciousness                                                                                  | Normal                                                                | R temporal slowing and sharp waves                                                                      | PHT 100-200 qd       | Neutral effects; tried for a few weeks but developed intolerable nausea                          |
|      |      |                                                                                                        |   |   |                                       |                         |                                                   |                   |                                                                                                                                               |                                                                       |                                                                                                         | CMZ 200 qd           | Neutral effects; developed confusion and somnolence                                              |
|      |      |                                                                                                        |   |   |                                       |                         |                                                   |                   |                                                                                                                                               |                                                                       |                                                                                                         | VPA                  | Immediately did not tolerate                                                                     |
|      |      |                                                                                                        |   |   |                                       |                         |                                                   |                   |                                                                                                                                               |                                                                       |                                                                                                         | LEV 250 qd           | Intolerable dizziness, poor concentration, headaches and nausea                                  |
|      |      |                                                                                                        |   |   |                                       |                         |                                                   |                   |                                                                                                                                               |                                                                       |                                                                                                         | LTG 25 bid           | Seizure-free; LTM on LTG showed no epileptiform activity                                         |
| 27   | aMCI | Sjögren's syndrome                                                                                     | F | R | 74 (memory)                           | 78                      | 74                                                | 27 (78)           | Staring spells and expressive aphasia, occurring every 3-4 months. Once developed L leg shaking and altered consciousness                     | Global cortical and hippocampal atrophy                               | 1 <sup>st</sup> : R frontal epileptiform activity<br>2 <sup>nd</sup> : Rare bursts of R frontal slowing | LEV 500 qam, 750 qhs | Seizure-free; did not tolerate higher doses (1500 mg/day) due to poor concentration              |

Abbreviations: AD=Alzheimer's disease, AED=antiepileptic drug, aMCI=amnesic mild cognitive impairment, bid=twice a day, CABG=coronary artery bypass graft, CAD=coronary artery disease, CMZ=carbamazepine, cog.=cognitive, CPAP= continuous positive airway pressure, dx=diagnosis, G=gender, H=handedness, HTN=hypertension, HL=hyperlipidemia, L=left, LEV=levetiracetam, LTG=lamotrigine, LTM=long-term video-EEG monitoring, MMSE=Mini-Mental State Exam, OSA=obstructive sleep apnea, PAF=paroxysmal atrial fibrillation, PHT=phenytoin, PMH=past medical history, s/p=status post, qam=every morning, qd=every day, qhs=every bedtime, qpm=every evening, R=right, SD=standard deviation, tid=three times a day, TPM=topiramate, VPA=valproic acid.

eTable (continued):

| Case | Dx   | PMH                                                                       | G | H | Age of onset of cog. decline (domain) | Age at dx of aMCI or AD | Age of 1 <sup>st</sup> seizure or EEG abnormality | MMSE (0-30) (age) | Seizure semiology and frequency                                                                                                 | MRI at age of dx of aMCI or AD                                                 | EEG                                                                                                                                                         | AED and dose (mg)          | Efficacy/Tolerability                                                                 |
|------|------|---------------------------------------------------------------------------|---|---|---------------------------------------|-------------------------|---------------------------------------------------|-------------------|---------------------------------------------------------------------------------------------------------------------------------|--------------------------------------------------------------------------------|-------------------------------------------------------------------------------------------------------------------------------------------------------------|----------------------------|---------------------------------------------------------------------------------------|
| 28   | AD   | OSA s/p uvuloplasty, HL, 2 concussions s/p falls at age ~54               | M | R | 58 (memory)                           | 60                      | 58                                                | 29/30 (59)        | Burning smell followed by sense of fear and nausea then unconsciousness for 2 min, occurring monthly                            | Global atrophy, predominantly posterior cortical                               | Normal                                                                                                                                                      | LTG 150 bid                | Partial response; LTG 100 bid was less effective                                      |
| 29   | aMCI | Pacemaker for ictal bradycardia, HL                                       | M | R | 73 (memory)                           | 76                      | 74                                                | 26 (76)           | Lightheadedness, then blank stare for 30 sec, occurring weekly to monthly                                                       | Not performed (CT brain showed mild volume loss and mild white matter disease) | (Sleep deprived) normal                                                                                                                                     | Lacosamide 50 bid          | Seizure-free; lower doses were partially effective                                    |
| 30   | aMCI | Bladder cancer s/p chemotherapy, mild aortic regurgitation                | M | R | 74 (memory)                           | 77                      | 75                                                | 26 (77)           | Sudden behavioral arrest with eyes closed, lasting seconds to minutes, followed by disorientation, occurring 6-10 times a month | Mild global atrophy and scattered T2 hyperintensities                          | 1st: normal<br>2nd: L temporal small-sharp spikes during sleep (normal variant)<br>3rd (LTM): focal epileptiform discharges over L anterior temporal region | LTG 25 bid                 | Urticarial rash after 3 weeks (seizure-free during this time)                         |
|      |      |                                                                           |   |   |                                       |                         |                                                   |                   |                                                                                                                                 |                                                                                |                                                                                                                                                             | VPA 250 qhs                | Partial response                                                                      |
| 31   | aMCI | HTN, HL, type II diabetes, CAD, Hypothyroidism, mild concussion at age 18 | M | R | 64 (memory)                           | 67                      | 66                                                | 29 (67)           | Global prickling feeling, j'aurais vu, profound panic and fear, lasting few min, occurring daily                                | Normal                                                                         | None                                                                                                                                                        | None                       | n/a                                                                                   |
| 32   | AD   | Hypo--thyroidism, CAD, sleep apnea on CPAP                                | M | R | 65 (memory)                           | 71                      | 63                                                | 28 (71)           | Blank stare, followed by generalized tonic-clonic seizure, lasting 2-3 min, occurring every few months                          | Generalized atrophy, mild periventricular white matter disease                 | 1 <sup>st</sup> : R temporal slowing<br>2nd: bilateral anterior slowing<br>3rd: epileptiform discharges arising independently from both temporal lobes      | PHT 300 bid                | Partial response;<br>Side effects of dizziness, lethargy, ataxia, cognitive worsening |
|      |      |                                                                           |   |   |                                       |                         |                                                   |                   |                                                                                                                                 |                                                                                |                                                                                                                                                             | LTG 200 bid                | Partial response                                                                      |
|      |      |                                                                           |   |   |                                       |                         |                                                   |                   |                                                                                                                                 |                                                                                |                                                                                                                                                             | LTG 200 bid<br>LEV 500 qhs | Seizure-free                                                                          |
| 33   | AD   | Myoclonus                                                                 | F | R | 60 (language)                         | 63                      | 64                                                | 27 (64)           | Rigid and pale for 10 sec, followed by being upset and confused for several hours, occurring monthly to yearly                  | Mild white matter disease                                                      | None                                                                                                                                                        | VPA 375 tid                | Partial response                                                                      |

Abbreviations: AD=Alzheimer's disease, AED=antiepileptic drug, aMCI=amnesic mild cognitive impairment, bid=twice a day, CABG=coronary artery bypass graft, CAD=coronary artery disease, CMZ=carbamazepine, cog.=cognitive, CPAP= continuous positive airway pressure, dx=diagnosis, G=gender, H=handedness, HTN=hypertension, HL=hyperlipidemia, L=left, LEV=levetiracetam,



LTG=lamotrigine, LTM=long-term video-EEG monitoring, MMSE=Mini-Mental State Exam, OSA=obstructive sleep apnea, PAF=paroxysmal atrial fibrillation, PHT=phenytoin, PMH=past medical history, s/p=status post, qam=every morning, qd=every day, qhs=every bedtime, qpm=every evening, R=right, SD=standard deviation, tid=three times a day, TPM=topiramate, VPA=valproic acid.

eTable (continued):

| Case | Dx | PMH                                                                 | G | H | Age of onset of cog. decline (domain) | Age at dx of aMCI or AD | Age of 1 <sup>st</sup> seizure or EEG abnormality | MMSE (0-30) (age) | Seizure semiology and frequency                                                                                                                                                                                                | MRI at age of dx of aMCI or AD                                                                   | EEG                                                                                                                                                                                                                                                                                                                                                       | AED and dose (mg)                                     | Efficacy/Tolerability                                              |
|------|----|---------------------------------------------------------------------|---|---|---------------------------------------|-------------------------|---------------------------------------------------|-------------------|--------------------------------------------------------------------------------------------------------------------------------------------------------------------------------------------------------------------------------|--------------------------------------------------------------------------------------------------|-----------------------------------------------------------------------------------------------------------------------------------------------------------------------------------------------------------------------------------------------------------------------------------------------------------------------------------------------------------|-------------------------------------------------------|--------------------------------------------------------------------|
| 34   | AD | HL, anti-phospholipid antibody and elevated factor VIII on coumadin | M | R | 74 (memory)                           | 77                      | 76                                                | 30 (76)           | Acute spells of profound confusion and amnesia, occurring weekly to monthly                                                                                                                                                    | Bilateral cortical and hippocampal atrophy; age-appropriate periventricular white matter disease | L temporal sharp and slow wave complexes                                                                                                                                                                                                                                                                                                                  | LEV 250 bid                                           | Partial response; repeat EEG on LEV was normal                     |
|      |    |                                                                     |   |   |                                       |                         |                                                   |                   |                                                                                                                                                                                                                                |                                                                                                  |                                                                                                                                                                                                                                                                                                                                                           | LTG                                                   | Not tolerated; more confusion                                      |
|      |    |                                                                     |   |   |                                       |                         |                                                   |                   |                                                                                                                                                                                                                                |                                                                                                  |                                                                                                                                                                                                                                                                                                                                                           | Zonisamide 100 qhs                                    | Seizure-free                                                       |
| 35   | AD | Chronic myelogenous leukemia                                        | F | R | 79 (apathy)                           | 86                      | 85                                                | 13 (86)           | Decreased vocalization, then R-sided tonic-clonic activity sometimes with generalization followed by a post-ictal state, occurring in clusters yearly                                                                          | Not performed (CT brain showed diffuse atrophy and periventricular white matter disease)         | Diffuse slowing                                                                                                                                                                                                                                                                                                                                           | PHT 400 qd                                            | Neutral effects; developed sedation and ataxia                     |
|      |    |                                                                     |   |   |                                       |                         |                                                   |                   |                                                                                                                                                                                                                                |                                                                                                  |                                                                                                                                                                                                                                                                                                                                                           | LEV 1000 qam, 750 qpm                                 | Partial response                                                   |
| 36   | AD | sleep apnea on CPAP, HL, B12 deficiency, depression                 | M | R | 58 (memory)                           | 64                      | 62                                                | 27 (62)           | Generalized tonic-clonic for 1 min followed by postictal state, occurring 4 times total                                                                                                                                        | Bilateral hippocampal volume loss and minimal cortical atrophy                                   | Semi-rhythmic 5-6 Hz slowing in bilateral frontotemporal regions                                                                                                                                                                                                                                                                                          | PHT 500 qd                                            | Seizure-free                                                       |
|      |    |                                                                     |   |   |                                       |                         |                                                   |                   |                                                                                                                                                                                                                                |                                                                                                  |                                                                                                                                                                                                                                                                                                                                                           | LTG 150 bid                                           | Seizure-free                                                       |
| 37   | AD | Depression, sleep apnea, HTN, HL                                    | F | R | 67 (memory)                           | 75                      | 72                                                | 29 (72)           | Gastric upset, heavy chest, increased respiratory rate, physical agitation, traveling numbness, burping, and urgent need to urinate, followed by sleepiness and atony; episodes lasting minutes and occurring 2-10 times a day | Diffuse cortical and hippocampal atrophy (L>R), periventricular/subcortical white matter disease | 1 <sup>st</sup> : frontal intermittent rhythmic delta activity<br>2 <sup>nd</sup> (sleep deprived): epileptiform spike discharges in L frontotemporal region (F7), paroxysmal bursts of semirhythmic, frontally predominant diffuse delta activity<br>3 <sup>rd</sup> (LTM 6 days while zonisamide weaned off): sharp waves in L frontotemporal lobe (F7) | LEV 1000 bid                                          | Partial response                                                   |
|      |    |                                                                     |   |   |                                       |                         |                                                   |                   |                                                                                                                                                                                                                                |                                                                                                  |                                                                                                                                                                                                                                                                                                                                                           | Zonisamide 1000 bid                                   | Partial response                                                   |
|      |    |                                                                     |   |   |                                       |                         |                                                   |                   |                                                                                                                                                                                                                                |                                                                                                  |                                                                                                                                                                                                                                                                                                                                                           | LEV 500 qd<br>LTG 25 qd                               | Briefly used but had several breakthrough seizures                 |
|      |    |                                                                     |   |   |                                       |                         |                                                   |                   |                                                                                                                                                                                                                                |                                                                                                  |                                                                                                                                                                                                                                                                                                                                                           | Carbamazepine extended release 200 bid<br>VPA 750 bid | Used for 2 months and had one possible seizure<br>Partial response |
|      |    |                                                                     |   |   |                                       |                         |                                                   |                   |                                                                                                                                                                                                                                |                                                                                                  |                                                                                                                                                                                                                                                                                                                                                           | VPA 1000 bid                                          | Delirious and sedated                                              |
|      |    |                                                                     |   |   |                                       |                         |                                                   |                   |                                                                                                                                                                                                                                |                                                                                                  |                                                                                                                                                                                                                                                                                                                                                           | VPA 250 bid<br>LTG 12.5 qd                            | Partial response                                                   |
|      |    |                                                                     |   |   |                                       |                         |                                                   |                   |                                                                                                                                                                                                                                |                                                                                                  |                                                                                                                                                                                                                                                                                                                                                           | VPA 250 bid<br>Lacosamide 50 qd                       | Partial response                                                   |

Abbreviations: AD=Alzheimer's disease, AED=antiepileptic drug, aMCI=amnesic mild cognitive impairment, bid=twice a day, CABG=coronary artery bypass graft, CAD=coronary artery disease, CMZ=carbamazepine, cog.=cognitive, CPAP= continuous positive airway pressure, dx=diagnosis, G=gender, H=handedness, HTN=hypertension, HL=hyperlipidemia, L=left, LEV=levetiracetam, LTG=lamotrigine, LTM=long-term video-EEG monitoring, MMSE=Mini-Mental State Exam, OSA=obstructive sleep apnea, PAF=paroxysmal atrial fibrillation, PHT=phenytoin, PMH=past medical history, s/p=status post, qam=every morning, qd=every day, qhs=every bedtime, qpm=every evening, R=right, SD=standard deviation, tid=three times a day, TPM=topiramate, VPA=valproic acid.

## eTable (continued):

| Case | Dx | PMH                                                     | G | H | Age of onset of cog. decline (domain) | Age at dx of aMCI or AD | Age of 1 <sup>st</sup> seizure or EEG abnormality | MMSE (0-30) (age) | Seizure semiology and frequency                                                                                                                                                              | MRI at age of dx of aMCI or AD                                                                                                 | EEG                                                                                                                                                                                                   | AED and dose (mg)                         | Efficacy/Tolerability                                                             |
|------|----|---------------------------------------------------------|---|---|---------------------------------------|-------------------------|---------------------------------------------------|-------------------|----------------------------------------------------------------------------------------------------------------------------------------------------------------------------------------------|--------------------------------------------------------------------------------------------------------------------------------|-------------------------------------------------------------------------------------------------------------------------------------------------------------------------------------------------------|-------------------------------------------|-----------------------------------------------------------------------------------|
| 38   | AD | Pacemaker for ictal bradycardia (captured on LTM)       | M | R | 58 (apathy)                           | 59                      | 59                                                | 24 (59)           | Sinking sensations of hot and cold down center of body and diaphoresis, lasting several min, occurring in clusters every 15-60 min all day, every 2 weeks                                    | Not performed (CT brain showed R>L dorsolateral atrophy)                                                                       | 1 <sup>st</sup> (3 -day LTM) bi-hemispheric slowing during sinking spells, occasional L temporal slowing<br>2 <sup>nd</sup> (2-day LTM): mild slowing, no events captured                             | Oxcarbazepine 750 bid                     | Neutral effects                                                                   |
|      |    |                                                         |   |   |                                       |                         |                                                   |                   |                                                                                                                                                                                              |                                                                                                                                |                                                                                                                                                                                                       | LTG 150 bid                               | Neutral effects                                                                   |
| 39   | AD | Essential tremor, HTN                                   | F | R | 71 (memory)                           | 74                      | 77                                                | 16 (74)           | Arm myoclonus with occasional loss of postural tone and confusion, every 5-10 min for 1 hr, every 2-3 days                                                                                   | Temporal > parietal atrophy bilaterally                                                                                        | 1 <sup>st</sup> : focal L hemispheric slowing and rare L central epileptiform discharges<br>2 <sup>nd</sup> (2 hour): L-sided diffuse slowing and occasional sharpened elements over L central region | VPA 125 qam, 250 qpm                      | Partial response                                                                  |
|      |    |                                                         |   |   |                                       |                         |                                                   |                   |                                                                                                                                                                                              |                                                                                                                                |                                                                                                                                                                                                       | VPA 125 qam, 250 qpm<br>Clonazepam 0.5 qd | Not tolerated due to imbalance                                                    |
| 40   | AD | Type II diabetes, HTN, HL, hypo-thyroidism, sleep apnea | F | R | 80 (memory)                           | 81                      | 80                                                | 25 (81)           | Sudden fear, lightheadedness, rhinorrhea, trembling in chest, and fatigue, lasting 60 sec, occurring monthly; once generalized with postictal R gaze deviation, L-sided weakness and neglect | Mild cortical and hippocampal atrophy, scattered T2 hyperintensities in periventricular and subcortical regions and cerebellum | Focal R hemisphere polymorphic delta slowing                                                                                                                                                          | LTG                                       | Allergy during dose escalation                                                    |
|      |    |                                                         |   |   |                                       |                         |                                                   |                   |                                                                                                                                                                                              |                                                                                                                                |                                                                                                                                                                                                       | LEV 125 qam, 250 qpm                      | Not tolerated due to behavioral worsening                                         |
| 41   | AD | HTN, coccidio-mycosis treated                           | M | R | 73 (memory)                           | 74                      | 72                                                | 24 (74)           | Head turning to R with R hemibody jerking for minutes, followed by mutism for over an hour, then aphasia with paraphasic errors, occurring every few months                                  | Generalized atrophy with mild periventricular white matter disease                                                             | 1 <sup>st</sup> : semi-rhythmic slowing over L frontal region with superimposed epileptiform discharges<br>2 <sup>nd</sup> (4-day LTM): rare L temporal slowing and L mid-temporal sharps             | PHT                                       | Not tolerated due to encephalopathy, decreased appetite, and generalized weakness |
|      |    |                                                         |   |   |                                       |                         |                                                   |                   |                                                                                                                                                                                              |                                                                                                                                |                                                                                                                                                                                                       | Oxcarbazepine 600 bid                     | Partial response                                                                  |
|      |    |                                                         |   |   |                                       |                         |                                                   |                   |                                                                                                                                                                                              |                                                                                                                                |                                                                                                                                                                                                       | Oxcarbazepine 600 bid<br>LEV 500 bid      | Seizure-free                                                                      |

Abbreviations: AD=Alzheimer's disease, AED=antileptic drug, aMCI=amnesic mild cognitive impairment, bid=twice a day, CABG=coronary artery bypass graft, CAD=coronary artery disease, CMZ=carbamazepine, cog.=cognitive, CPAP= continuous positive airway pressure, dx=diagnosis, G=gender, H=handedness, HTN=hypertension, HL=hyperlipidemia, L=left, LEV=levetiracetam, LTG=lamotrigine, LTM=long-term video-EEG monitoring, MMSE=Mini-Mental State Exam, OSA=obstructive sleep apnea, PAF=paroxysmal atrial fibrillation, PHT=phenytoin, PMH=past medical history, s/p=status post, qam=every morning, qd=every day, qhs=every bedtime, qpm=every evening, R=right, SD=standard deviation, tid=three times a day, TPM=topiramate, VPA=valproic acid.

eTable (continued):

| Case | Dx | PMH                                                                                    | G | H | Age of onset of cog. decline (domain) | Age at dx of aMCI or AD | Age of 1 <sup>st</sup> seizure or EEG abnormality | MMSE (0-30) (age) | Seizure semiology and frequency                                                                                                                                                            | MRI at age of dx of aMCI or AD                                                                                                | EEG                                                                                                                                                                                                                   | AED and dose (mg)  | Efficacy/Tolerability                     |
|------|----|----------------------------------------------------------------------------------------|---|---|---------------------------------------|-------------------------|---------------------------------------------------|-------------------|--------------------------------------------------------------------------------------------------------------------------------------------------------------------------------------------|-------------------------------------------------------------------------------------------------------------------------------|-----------------------------------------------------------------------------------------------------------------------------------------------------------------------------------------------------------------------|--------------------|-------------------------------------------|
| 42   | AD | Type II diabetes, sleep apnea on CPAP, h/o possible concussion s/p fall during college | M | R | 69 (memory)                           | 76                      | 73                                                | 19 (78)           | Myoclonic jerks in single or multiple limbs every 1-3 sec, with occasional perseverations and agitation, lasting 20-30 min, occurring hourly to daily                                      | Generalized cortical atrophy, mild vascular disease                                                                           | 1 <sup>st</sup> (on VPA): central midline spikes<br>2 <sup>nd</sup> (on LEV 500 mg/day): polyspike discharges (Cz-Fz), time-locked to clinical myoclonus<br>3 <sup>rd</sup> (2 hours while on LEV 500 mg/day): normal | VPA 750/day        | Neutral effects                           |
|      |    |                                                                                        |   |   |                                       |                         |                                                   |                   |                                                                                                                                                                                            |                                                                                                                               |                                                                                                                                                                                                                       | LEV 250 bid        | Partial response                          |
|      |    |                                                                                        |   |   |                                       |                         |                                                   |                   |                                                                                                                                                                                            |                                                                                                                               |                                                                                                                                                                                                                       | Clonazepam 1.5 bid | Partial response                          |
| 43   | AD | Type II diabetes, HTN, HL                                                              | M | R | 79 (memory)                           | 80                      | 79                                                | 23/24 (80)        | Staring spells, unresponsive and afterwards confused, lasting 15 min, occurring twice separated by weeks                                                                                   | Bilateral hippocampal atrophy                                                                                                 | 1 <sup>st</sup> : normal, 2 <sup>nd</sup> (1-day LTM): normal                                                                                                                                                         | None               | n/a                                       |
| 44   | AD | Migraines, depression, myoclonus                                                       | F | R | 57 (language)                         | 59                      | 58                                                | 1 (59)            | Subclinical epileptiform activity                                                                                                                                                          | Bilateral insular and temporal lobe atrophy (L>R), and bilateral hippocampal and parietal atrophy                             | 1 <sup>st</sup> : occasional spike and wave activity in L temporal region<br>2 <sup>nd</sup> : bursts of bi-centrally predominant diffuse slowing<br>3 <sup>rd</sup> : L>R bihemispheric slowing                      | LEV750 bid         | Initially improvement in language         |
| 45   | AD | HTN, HL, CAD s/p stent                                                                 | M | L | 76 (language)                         | 79                      | 78                                                | 29 (77)           | Woozy, disoriented, blank expression, repeating self, shuffled walking, occasionally followed by generalized atony with loss of consciousness, lasting minutes to hours, occurring monthly | Hippocampal atrophy, (R>L), bilateral insular and orbitofrontal atrophy, subcortical and periventricular white matter changes | None                                                                                                                                                                                                                  | LTG 50 qam, 25 qpm | Seizure-free (partial response on 25 bid) |

Abbreviations: AD=Alzheimer's disease, AED=antiepileptic drug, aMCI=amnesic mild cognitive impairment, bid=twice a day, CABG=coronary artery bypass graft, CAD=coronary artery disease, CMZ=carbamazepine, cog.=cognitive, CPAP=continuous positive airway pressure, dx=diagnosis, G=gender, H=handedness, HTN=hypertension, HL=hyperlipidemia, L=left, LEV=levetiracetam, LTG=lamotrigine, LTM=long-term video-EEG monitoring, MMSE=Mini-Mental State Exam, OSA=obstructive sleep apnea, PAF=paroxysmal atrial fibrillation, PHT=phenytoin, PMH=past medical history, s/p=status post, qam=every morning, qd=every day, qhs=every bedtime, qpm=every evening, R=right, SD=standard deviation, tid=three times a day, TPM=topiramate, VPA=valproic acid.

## eTable (continued):

| Case | Dx | PMH                                                                             | G | H | Age of onset of cog. decline (domain) | Age at dx of aMCI or AD | Age of 1 <sup>st</sup> seizure or EEG abnormality | MMSE (0-30) (age) | Seizure semiology and frequency                                                                                              | MRI at age of dx of aMCI or AD                                                                                      | EEG                                                                                                              | AED and dose (mg)                | Efficacy/Tolerability                                                           |
|------|----|---------------------------------------------------------------------------------|---|---|---------------------------------------|-------------------------|---------------------------------------------------|-------------------|------------------------------------------------------------------------------------------------------------------------------|---------------------------------------------------------------------------------------------------------------------|------------------------------------------------------------------------------------------------------------------|----------------------------------|---------------------------------------------------------------------------------|
| 46   | AD | HTN, HL                                                                         | M | R | 59 (memory)                           | 64                      | 66                                                | 25 (68)           | Sudden feeling of dread/intense fear and diaphoresis, lasting minutes, occurring in clusters over 2-3 days once a month      | L hippocampal atrophy and possible L mesial temporal sclerosis; mild global atrophy and patchy white matter changes | Normal (done at age 64 prior to seizures)                                                                        | None                             | n/a                                                                             |
| 47   | AD | HTN, HL, endometrial cancer s/p hysterectomy, meningitis age 2 without sequelae | F | R | 55 (executive)                        | 57                      | 56                                                | 23 (57)           | Subclinical epileptiform activity                                                                                            | Mild cortical atrophy                                                                                               | 3-4 R anterior temporal epileptiform discharges                                                                  | None                             | n/a                                                                             |
| 48   | AD | Migraines, depression                                                           | F | R | 50 (memory)                           | 58                      | 54                                                | 26 (55)           | Overwhelming rancid smell followed by nausea/vomiting, lasting 1 min, occurring monthly                                      | Mild hippocampal and cortical atrophy                                                                               | 1 <sup>st</sup> : normal<br>2 <sup>nd</sup> : R frontotemporal spikes and sharp waves                            | VPA 1500 ER qd                   | Partial response                                                                |
|      |    |                                                                                 |   |   |                                       |                         |                                                   |                   |                                                                                                                              |                                                                                                                     |                                                                                                                  | VPA 1500 ER qd,<br>Carbamazepine | Carbamazepine not tolerated (ataxia)                                            |
|      |    |                                                                                 |   |   |                                       |                         |                                                   |                   |                                                                                                                              |                                                                                                                     |                                                                                                                  | LTG 50 bid                       | Seizure-free                                                                    |
| 49   | AD | Type II diabetes, HL, HTN, depression, uterine fibroids s/p hysterectomy        | F | R | 56 (memory)                           | 69                      | 69                                                | 17 (69)           | Generalized tonic-clonic occurring 4 times over a few days                                                                   | Moderate global cortical atrophy and subcortical ischemic vascular disease                                          | None                                                                                                             | VPA 1000 ER qd                   | Seizure-free                                                                    |
| 50   | AD | Uveitis in childhood, depression/anxiety, prostate cancer                       | M | R | 60 (memory)                           | 63                      | 69                                                | 4 (70)            | Generalized tonic-clonic and myoclonic seizures lasting 1-2 min followed by postictal confusion, occurring weekly to monthly | Generalized cortical atrophy                                                                                        | (1.5-day LTM)<br>Diffuse slowing and generalized spike-wave discharges accompanying intermittent myoclonic jerks | LTG                              | Not tolerated due to aggressiveness                                             |
|      |    |                                                                                 |   |   |                                       |                         |                                                   |                   |                                                                                                                              |                                                                                                                     |                                                                                                                  | Gabapentin 300 bid               | Emergence of myoclonic jerks and breakthrough generalized tonic-clonic seizures |
|      |    |                                                                                 |   |   |                                       |                         |                                                   |                   |                                                                                                                              |                                                                                                                     |                                                                                                                  | VPA 375 ER bid                   | No efficacy                                                                     |

Abbreviations: AD=Alzheimer's disease, AED=antiepileptic drug, aMCI=amnesic mild cognitive impairment, bid=twice a day, CABG=coronary artery bypass graft, CAD=coronary artery disease, CMZ=carbamazepine, cog.=cognitive, CPAP= continuous positive airway pressure, dx=diagnosis, G=gender, H=handedness, HTN=hypertension, HL=hyperlipidemia, L=left, LEV=levetiracetam, LTG=lamotrigine, LTM=long-term video-EEG monitoring, MMSE=Mini-Mental State Exam, OSA=obstructive sleep apnea, PAF=paroxysmal atrial fibrillation, PHT=phenytoin, PMH=past medical history, s/p=status post, qam=every morning, qd=every day, qhs=every bedtime, qpm=every evening, R=right, SD=standard deviation, tid=three times a day, TPM=topiramate, VPA=valproic acid.

eTable (continued):

| Case | Dx | PMH                                           | G | H | Age of onset of cog. decline (domain) | Age at dx of aMCI or AD | Age of 1 <sup>st</sup> seizure or EEG abnormality | MMSE (0-30) (age) | Seizure semiology and frequency                                        | MRI at age of dx of aMCI or AD                                                                          | EEG                                                                                                                                                        | AED and dose (mg) | Efficacy/Tolerability |
|------|----|-----------------------------------------------|---|---|---------------------------------------|-------------------------|---------------------------------------------------|-------------------|------------------------------------------------------------------------|---------------------------------------------------------------------------------------------------------|------------------------------------------------------------------------------------------------------------------------------------------------------------|-------------------|-----------------------|
| 51   | AD | Pacemaker for ictal bradycardia, HTN, anxiety | F | R | 57 (memory)                           | 61                      | 61                                                | 24 (61)           | Generalized atonic seizures lasting 30 sec, occurring twice in a month | Mild hippocampal atrophy R>L                                                                            | 1 <sup>st</sup> : occasional frontal intermittent delta activity<br>2 <sup>nd</sup> : 3-5 sec episodes of 2-3 hertz bifrontal sharp and slow wave activity | LTG 25 bid        | Seizure-free          |
| 52   | AD | HTN                                           | F | R | 74 (memory)                           | 77                      | 82                                                | none              | Subclinical epileptiform activity                                      | Generalized cortical atrophy                                                                            | Multifocal but predominantly L frontotemporal sharps                                                                                                       | None              | n/a                   |
| 53   | AD | HTN, HL, kidney stones                        | M | R | 65 (memory)                           | 70                      | 70                                                | 24 (70)           | Subclinical epileptiform activity                                      | Diffuse atrophy, particularly in parietal regions, and subtly increased T2 signal in the hippocampi L>R | Intermittent bursts of bitemporal slowing (R>L) with R temporal sharp waves                                                                                | None              | n/a                   |
| 54   | AD | HTN, HL                                       | M | R | 45 (memory)                           | 55                      | 55                                                | 27 (55)           | Subclinical epileptiform activity                                      | Normal                                                                                                  | Fragments of generalized epileptiform discharges                                                                                                           | LTG 200 bid       | Remained seizure-free |

Abbreviations: AD=Alzheimer's disease, AED=antilepileptic drug, aMCI=amnesic mild cognitive impairment, bid=twice a day, CABG=coronary artery bypass graft, CAD=coronary artery disease, CMZ=carbamazepine, cog.=cognitive, CPAP= continuous positive airway pressure, dx=diagnosis, G=gender, H=handedness, HTN=hypertension, HL=hyperlipidemia, L=left, LEV=levetiracetam, LTG=lamotrigine, LTM=long-term video-EEG monitoring, MMSE=Mini-Mental State Exam, OSA=obstructive sleep apnea, PAF=paroxysmal atrial fibrillation, PHT=phenytoin, PMH=past medical history, s/p=status post, qam=every morning, qd=every day, qhs=every bedtime, qpm=every evening, R=right, SD=standard deviation, tid=three times a day, TPM=topiramate, VPA=valproic acid.
